RESEARCH ARTICLE

# Gout and Risk of Myocardial Infarction: A Systematic Review and Meta-Analysis of Cohort Studies

Shuang-Chun Liu<sup>1</sup>✉, Lei Xia<sup>2</sup>✉, Jin Zhang<sup>1</sup>, Xue-Hong Lu<sup>3</sup>, Da-Kang Hu<sup>1</sup>, Hai-Tao Zhang<sup>4†\*</sup>, Hai-Jun Li<sup>5†\*</sup>

**1** Department of Clinical Laboratory, Taizhou Municipal Hospital, Taizhou, Zhejiang, China, **2** Department of Urinary Surgery, Affiliated Renji Hospital, Medical School of Shanghai Jiao Tong University, Shanghai, China, **3** Department of Pediatrics, Taizhou Municipal Hospital, Taizhou, Zhejiang, China, **4** Department of Urinary Surgery, Taizhou Municipal Hospital, Taizhou, Zhejiang, China, **5** Department of Neurology, Taizhou Municipal Hospital, Taizhou, Zhejiang, China

✉ These authors contributed equally to this work.

† These authors also contributed equally to this work.

\* [tzhanghaitao@hotmail.com](mailto:tzhanghaitao@hotmail.com) (HTZ); [lhjy@126.com](mailto:lhjy@126.com) (HJL)

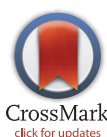

## Abstract

### OPEN ACCESS

**Citation:** Liu S-C, Xia L, Zhang J, Lu X-H, Hu D-K, Zhang H-T, et al. (2015) Gout and Risk of Myocardial Infarction: A Systematic Review and Meta-Analysis of Cohort Studies. PLoS ONE 10(7): e0134088. doi:10.1371/journal.pone.0134088

**Editor:** Carmine Pizzi, University of Bologna, ITALY

**Received:** January 16, 2015

**Accepted:** July 6, 2015

**Published:** July 31, 2015

**Copyright:** © 2015 Liu et al. This is an open access article distributed under the terms of the [Creative Commons Attribution License](https://creativecommons.org/licenses/by/4.0/), which permits unrestricted use, distribution, and reproduction in any medium, provided the original author and source are credited.

**Data Availability Statement:** All relevant data are within the paper and its Supporting Information files.

**Funding:** The present study was supported by Medical Science and Technology Support of Zhejiang Province (2013ZHB015). The funders had no role in study design, data collection and analysis, decision to publish, or preparation of the manuscript.

**Competing Interests:** The authors have declared that no competing interests exist.

## Introduction

A high incidence of myocardial infarction among patients with gout has been suggested by several observational studies. We performed a meta-analysis to evaluate the association between gout and the risk of myocardial infarction.

## Materials and Methods

The PubMed and Embase databases were searched from inception to October 2014 for cohort studies that evaluating the association between gout and the risk of myocardial infarction. Summary estimates were derived using a random-effects model and reported as relative risks (RRs) with 95% confidence intervals (CIs).

## Results

Five studies involving 8,656,413 participants with a total of 1000 MI events were included. Overall, gout was associated with an increased risk of myocardial infarction (RR 1.45; 95% CI, 1.19–1.75;  $p < 0.001$ ), and the association referred to non-fatal myocardial infarction (RR 1.29; 95% CI, 1.19–1.39;  $p < 0.001$ ) but not fatal myocardial infarction (RR 1.11; 95% CI, 0.96–1.28;  $p = 0.174$ ). The increased risk was observed in both women (RR 1.62; 95% CI, 1.18–2.21;  $p = 0.003$ ) and men (RR 1.45; 95% CI, 1.21–1.74;  $p < 0.001$ ). Stratified analysis revealed a gradual increase in myocardial infarction risk with a younger age of gout onset (age 20–44 years old (RR 2.82; 95% CI, 1.38–5.79;  $p = 0.05$ ); 45–69 years old (RR 1.85; 95% CI, 1.22–2.82;  $p = 0.04$ );  $\geq 70$  years old (RR 1.52; 95% CI, 1.22–1.88;  $p < 0.001$ )).

## Conclusion

This meta-analysis suggests that patients with gout have an increased risk of myocardial infarction.

## Introduction

According to World Health Organization estimates, ischemic heart disease is the primary cause of death worldwide, accounting for 7.4 million fatalities [1,2]. Myocardial infarction (MI), which accounts for the majority of ischemic heart disease cases and affects approximately 1 US citizen per 44 seconds, is associated with undesirably high rates of morbidity and mortality; approximately 15% of MI cases are fatal [3,4]. Therefore, an exploration of MI risk factors for primary prevention should be a major public health priority.

Gout is the most prevalent form of inflammatory arthritis in developed countries, the prevalence of gout in clinical practices in the UK and Germany is 1.4%, and this disease is estimated to affect 0.9% and 3.9% adults in France and the USA respectively [5–7]. Epidemiologic studies have indicated that the incidence and prevalence of gout are increasing worldwide and that more people are at an increased risk of developing gout [8–10]. In gout patients, the inflammatory response associated with gout plays a key role in the initiation and progression of atherosclerosis, and promotion of a pro-thrombotic environment that leads to acute coronary events such as angina or MI [11,12]. To test this important hypothesis, a number of observational studies during the past decade have addressed the association between gout and the risk of MI [13–19]. However, no systematic reviews or data pooling for a definite conclusion have been attempted; we therefore performed a meta-analysis of cohort studies to evaluate the risk of MI among patients with gout versus those without gout.

## Materials and Methods

### Literature search

We adopted the Meta-analysis Of Observational Studies in Epidemiology (MOOSE) checklist when reporting this review [20]. We systematically searched the PubMed and Embase databases (from inception to October 2014) for studies investigating the association between gout and myocardial infarction. No language restrictions were imposed. Search terms included ‘gout’ and ‘myocardial infarction’. Furthermore, the reference lists of identified manuscripts were hand-searched and scrutinized to identify other relevant publications.

### Selection criteria

We applied the following inclusion criteria when selecting eligible studies: (i) cohort study; (ii) examination of the association between gout and the risk of MI; (iii) reported the effect size data such as odds ratios (ORs), hazard ratios (HRs) or relative risks (RRs) with 95% confidence intervals (CIs) or provided data allowing the calculation of these values.

### Data extraction

The following information were extracted from each included study: first author, publication year, country, population characteristics, cohort size, number of gout cases, number of MI events, follow-up duration, ascertainment of gout, assessment of MI, and adjusted covariates. Supplementary files were also examined for data abstraction. When necessary, we contacted

the authors of included articles for additional data. Extracted data were entered into a standardized Excel (Microsoft Corporation, Redmond, WA, USA) file. Data extraction was performed independently by two authors (SCL and LX). Any disagreement was resolved by discussion and consensus.

### Assessment of study quality

The Newcastle–Ottawa Scale (NOS) was used to assess the quality of each included study [21]. The quality of cohort studies was evaluated according to the following three major components: selection of the study group (0–4 points); quality of the confounding adjustment (0–2 points); and assessment of cohort outcomes (0–3 points). A higher NOS score indicates better methodological quality, as well as a lower risk of bias.

### Statistical analysis

We used RR as the common measure of an association between gout and the risk of MI. We conducted additional analyses to evaluate the risks of fatal MI and non-fatal MI, as well as the risks in both women and men. Furthermore, we performed stratified analyses to evaluate differences in risk between age groups (20–44 years versus 45–69 years versus  $\geq 70$  years). Heterogeneity was assessed using the Cochran Q statistic ( $p < 0.1$ ) and measured with the  $I^2$  statistic, which was used to estimate the percentage of effect size variability that is attributable to heterogeneity across studies [22–24].  $I^2$  values of 25%, 50%, and 75% were used as cut-off points for low, moderate, and significant degrees of heterogeneity respectively. A random-effects model was used regardless of heterogeneity. A  $p$  value  $< 0.05$  was considered statistically significant, unless where otherwise specified. We used STATA, version 12.0 (Stata Corporation, College Station, TX, USA) to perform the statistical analysis.

## Results

### Description of the studies

A detailed flowchart of the search and selection results is shown in Fig 1. The initial search identified a total of 357 potentially relevant records through electronic searching, and five additional records identified through other sources. Eighty-one records were excluded as duplicates, 267 were identified as irrelevant after reading the titles and abstracts, and the remaining 14 full-text articles were eligible for further assessment. After the inclusion criteria were applied, five studies with a total of 8,656,413 participants were included in the meta-analysis [13–17].

Table 1 shows the major characteristics of the five eligible cohort studies (additional details have been provided in S1 Table.), which were published between 2006 and 2013. Two studies were conducted in Canada, and one study each was conducted in the USA, UK, and China. The numbers of participants in each study ranged from 1,175 to 7,357,019 and the mean follow-ups ranged from 3.8 to 12 years. Study-specific quality assessments scores for the five articles are summarized in S2 Table. The quality scores ranged from 7 to 9 with an average score of 8, indicating that all the cohort studies are of high quality.

### Meta-analysis

**Gout and risk of MI.** Fig 2 shows the pooled results from the random-effects model that combined the multivariable-adjusted RRs for MI. A total of 8,656,413 participants were included in the analysis (242,604 cases with gout versus 8,413,809 cases without gout). Patients with gout had an increased risk of MI (RR 1.45; 95% CI, 1.19–1.75;  $p < 0.001$ ), and significant heterogeneity was observed ( $I^2 = 96.1\%$ ;  $p < 0.001$ ).

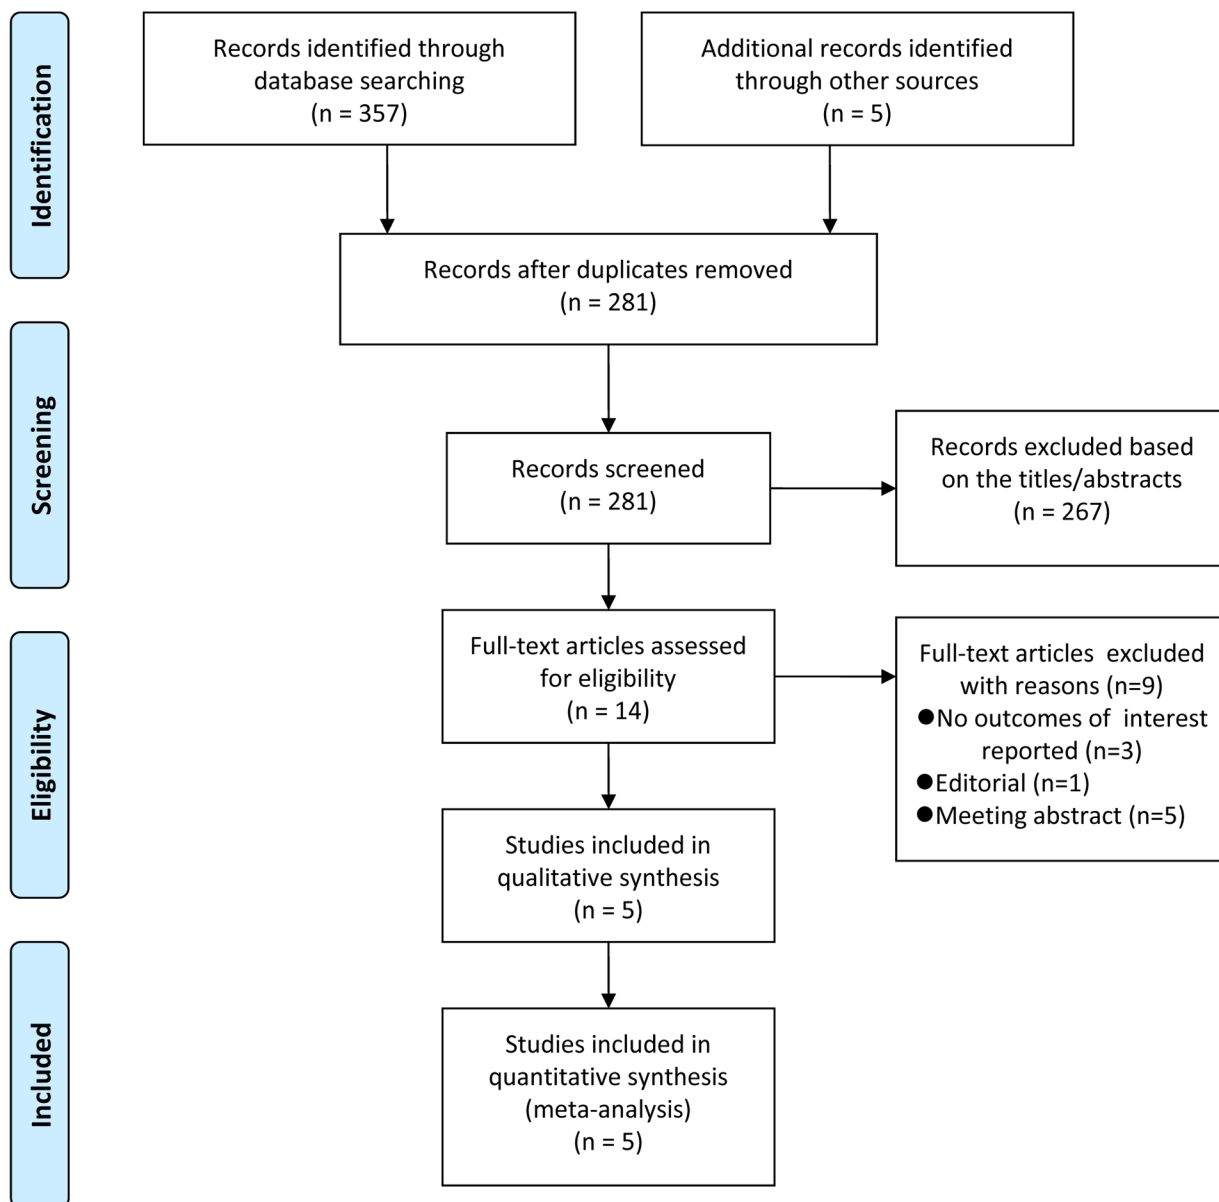

**Fig 1. Flow diagram for selection of articles.**

doi:10.1371/journal.pone.0134088.g001

Because of variations between studies with respect to use of the categories of MI, age and sex used in risk reporting, it was impossible to combine all five included studies and calculate a summary RR for each category.

**Stratified analyses.** The multivariable-adjusted RRs of combined appropriate studies for both fatal MI and non-fatal MI are shown in Fig 3. The pooled estimates of multivariable-adjusted RRs identified an apparent increased risk of non-fatal MI in gout patients (RR 1.29; 95% CI, 1.19–1.39;  $p < 0.001$ ); however, we found no significant association between gout and risk of fatal MI (RR 1.11; 95% CI, 0.96–1.28;  $p = 0.174$ ). We additionally performed a stratified analysis according to gender among patients with gout; the pooled estimated of multivariable-adjusted RRs for the risk of MI were (RR 1.62; 95% CI, 1.18–2.21;  $p = 0.003$ ) for female patients with gout and (RR 1.45; 95% CI, 1.21–1.74;  $p < 0.001$ ) for male patients, respectively (Fig 4).

**Table 1. Main characteristics of cohort studies included in the meta-analysis.** MI: myocardial infarction, AMI: acute myocardial infarction, PC: prospective cohort, RC: retrospective cohort, NA: not available, CABG: coronary artery bypass graft, ECG: electrocardiogram.

| Author/<br>year        | Category          | Area   | Age<br>(mean),<br>years       | Men,<br>% | Quality | Study<br>size | Gout   | MI    | Follow<br>up,<br>years | Study<br>design | Definition of<br>gout                                     | Assessment of<br>MI                                                          |
|------------------------|-------------------|--------|-------------------------------|-----------|---------|---------------|--------|-------|------------------------|-----------------|-----------------------------------------------------------|------------------------------------------------------------------------------|
| Krishnan/<br>2006 [13] | NA                | USA    | Gout 47<br>Not gout<br>46     | 100       | 9       | 12,866        | 1123   | 1108  | 6.5                    | PC              | Self-report<br>+documentation                             | Physician<br>evaluations,<br>hospital records,<br>EKGs, and<br>CABG surgery. |
| Choi/<br>2007 [14]     | Confirmed         | Canada | Gout 59<br>Not gout<br>54     | 100       | 8       | 1175          | 23     | NA    | 12                     | PC              | American<br>College of<br>Rheumatology<br>survey criteria | Questionnaires<br>and medical<br>record                                      |
| Choi/<br>2007 [14]     | Self-<br>reported | Canada | Gout 59<br>Not gout<br>54     | 100       | 7       | 1175          | 53     | NA    | 12                     | PC              | Self-reported                                             | Questionnaires<br>and medical<br>record                                      |
| DeVera/<br>2010 [15]   | Men               | Canada | Gout 73.9<br>Not gout<br>73.3 | 100       | 8       | 34512         | 5752   | 2272  | 7                      | RC              | ICD-9                                                     | ICD-9                                                                        |
| De Vera/<br>2010 [15]  | Women             | Canada | Gout 75.0<br>Not gout<br>75.0 | 0         | 8       | 23340         | 3890   | 996   | 7                      | RC              | ICD-9                                                     | ICD-9                                                                        |
| Kuo/2013<br>[16]       | Men               | China  | NA                            | 100       | 8       | 360432        | 18674  | 2636  | 8                      | RC              | ICD-9                                                     | ICD-9                                                                        |
| Kuo/2013<br>[16]       | Women             | China  | NA                            | 0         | 8       | 344071        | 7882   | 1082  | 8                      | RC              | ICD-9                                                     | ICD-9                                                                        |
| Seminog/<br>2013 [17]  | England           | UK     | NA                            | 74        | 7       | 7357019       | 202033 | 10995 | 3.8                    | RC              | ICD-7,8,9,10                                              | ICD-10                                                                       |
| Seminog/<br>2013 [17]  | ORLS              | UK     | NA                            | 73        | 8       | 521823        | 3174   | 89    | 5.7                    | RC              | ICD-7,8,9,10                                              | ICD-10                                                                       |

doi:10.1371/journal.pone.0134088.t001

Through a comparison of individuals with and without gout in each age group, we observed a gradual increase in MI risk with a younger age at gout onset. As shown in Fig 5, the pooled results demonstrated this graduated relationship: in the 20–44 years age group (RR 2.82; 95% CI, 1.38–5.79;  $p = 0.05$ ); in the 45–69 years age group (RR 1.85; 95% CI, 1.22–2.82;  $p = 0.04$ ); and in the  $\geq 70$  years age group (RR 1.52; 95% CI, 1.22–1.88;  $p < 0.001$ ).

## Discussion

### Main findings

To the best of our knowledge, this is the first systematic review and meta-analysis to investigate the association between gout and the risk of MI. The pooled results of five cohort studies suggest that both male and female patients with gout have an increased risk of non-fatal MI, but not of fatal MI. Furthermore, stratified analyses revealed a gradient of increased MI risk with a younger age at gout onset.

### Possible mechanisms

Although our meta-analysis indicated that patients with gout have an increased risk of MI, the underlying mechanism remains unclear and there are several possible mechanisms might explain the observed association. Hyperuricemia, which causes gout pathogenesis, and uric

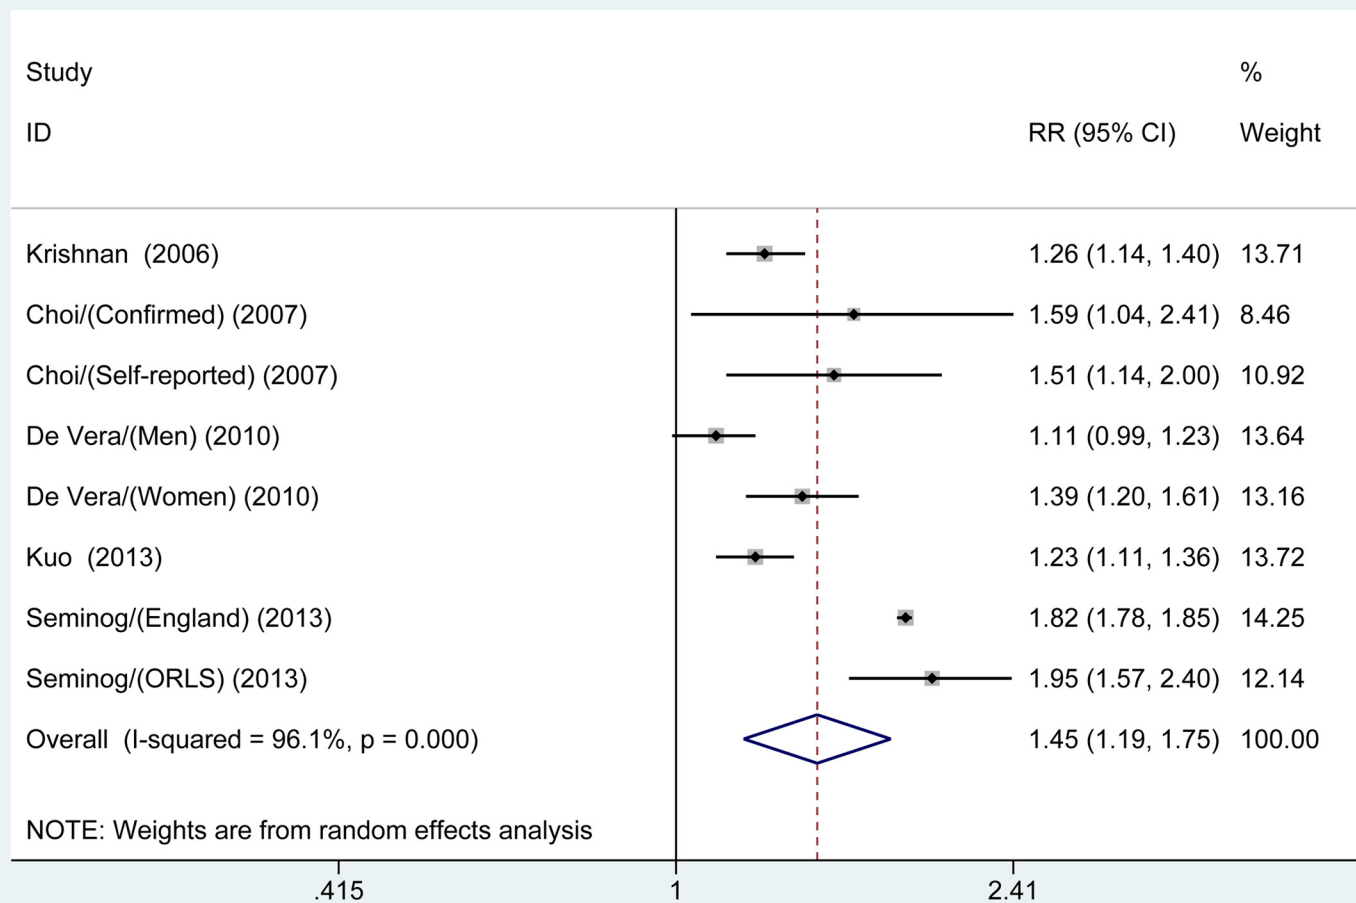

**Fig 2. Forest plot showing the risk of myocardial infarction in patients with gout.**

doi:10.1371/journal.pone.0134088.g002

acid, which perpetrates hyperuricemia, have been found to associate with cardiovascular disease (CVD).

The inflammatory response associated with gout is characterized simultaneously by the initiation of an acute attack and other typical complex interactions between various cell types [25]. Inflammation associated with gout may play an important role in the initiation and progression of atherosclerosis, as well as in plaque disruption and thrombotic complications, and the various triggers, amplifiers and innate and adaptive immune responses in the cascade of inflammatory events that promotes atherogenesis and thrombogenesis in correlation with CVD. And inflammation also has a long-term prognostic value because inflammation after CVD is associated with an increased risk of recurrent coronary events [26–31]. Therefore, the complex mechanisms of inflammation in patients with gout may lead to an increased risk of CVD.

Hyperuricemia is known to associate with various risk factors of cardiac disease, such as hypertension and obesity; these are also associated with the activation of circulating platelets and microvascular changes potentially reflective of endothelial dysfunction, which, as a precursor, may be an important contributor to the increased risk of CVD [32–35]. Correspondingly,

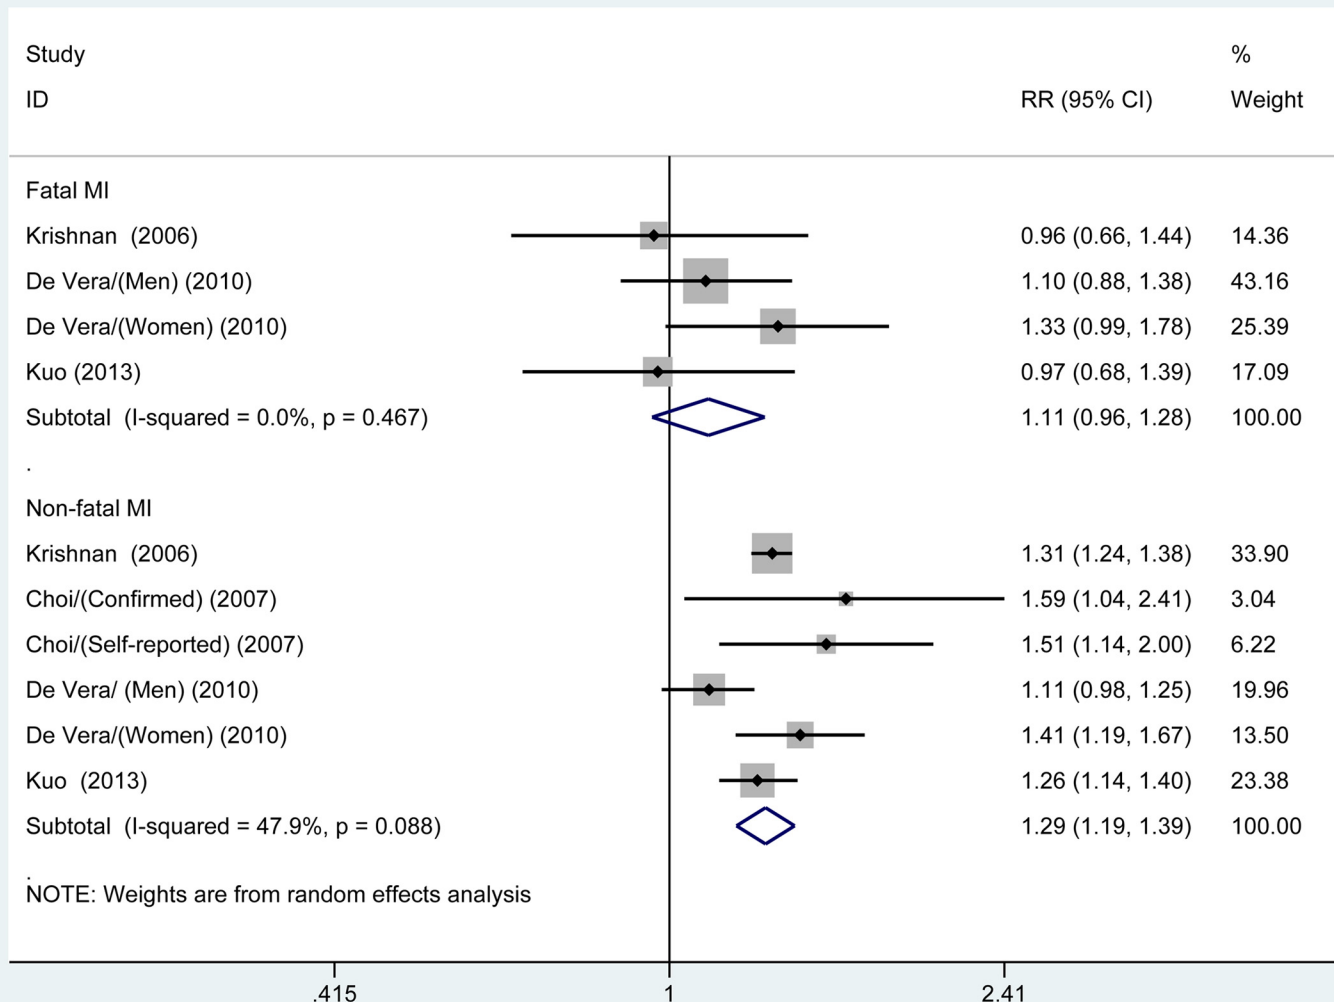

**Fig 3. Meta-analysis of the association between gout and different kinds of myocardial infarction (MI; fatal MI and non-fatal MI).**

doi:10.1371/journal.pone.0134088.g003

recent studies, including a meta-analysis found that hyperuricemia increased the risk of coronary heart disease [36, 37]. Although the association between uric acid and CVD has been recognized for more than a century, it has been rediscovered and appreciated over the past 60 years, during which many epidemiologic studies were performed, most of these studies suggested that increased uric acid levels associate significantly with the risk of CVD [38–43]. Furthermore, several lines of experiments have produced evidence consistent with the results of epidemiological studies; specifically that uric acid is not an inert molecule but rather a deleterious factor that contributes greatly to the development of CVD [44–46]. In addition, uric acid appears to potentially induce persistent systemic and vascular inflammation, as well as vascular mechanisms that might contribute to the progression of atherosclerotic changes and stimulate prothrombotic activity; additionally, uric acid also influences the nitric oxide production, elevates blood pressure, and leads to endothelial dysfunction, potentially also increasing the risk of atherosclerosis [33, 47–53]. Uric acid, hyperuricemia and gout are normally observed with

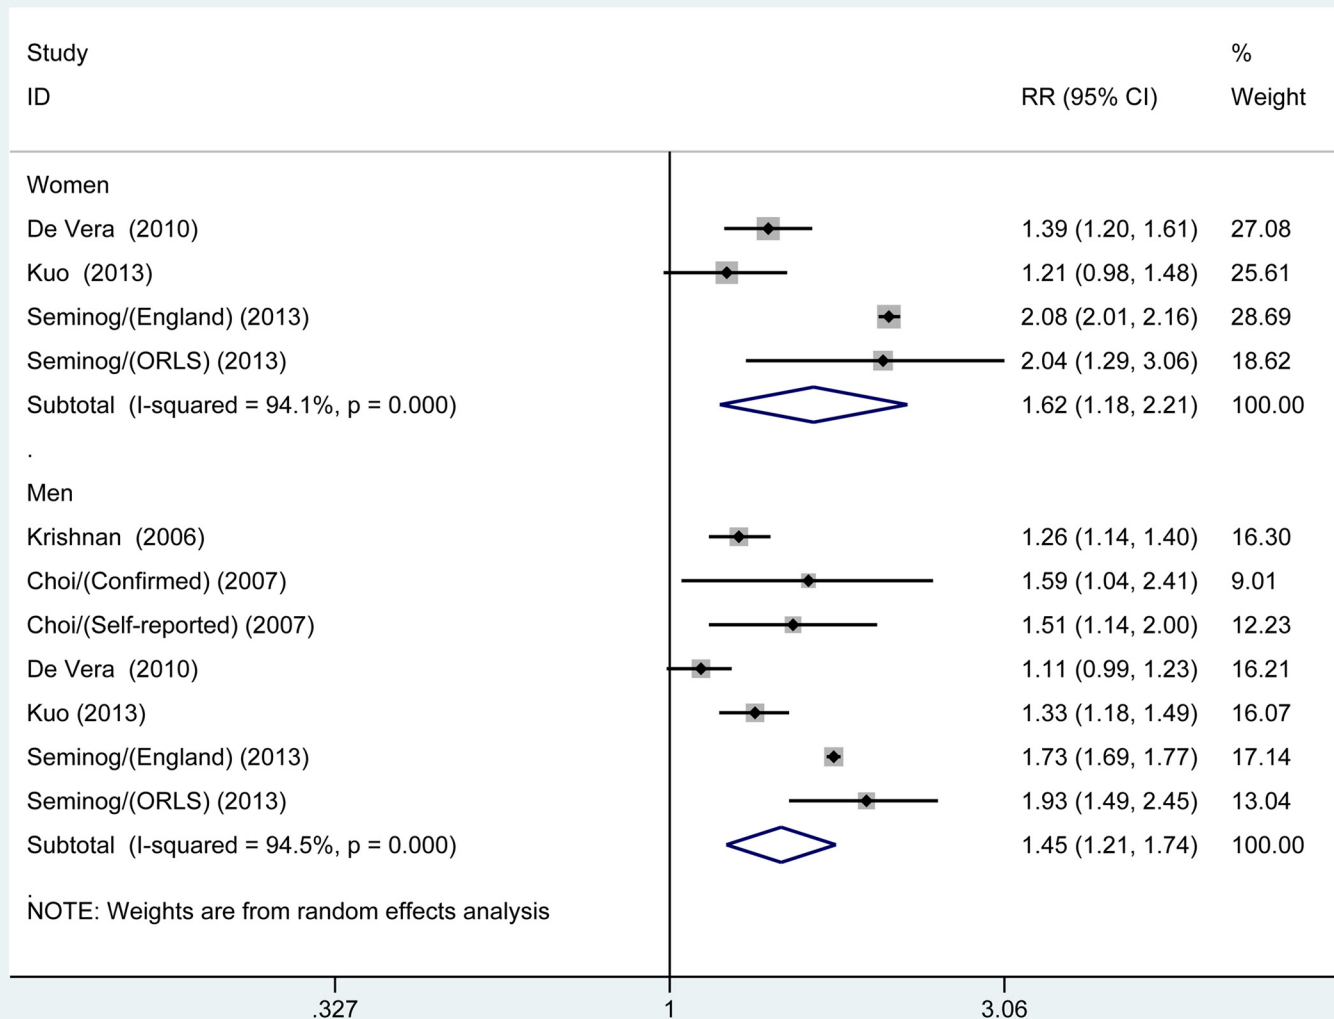

**Fig 4. Meta-analysis of the association between gout and risk of myocardial infarction in women and men.**

doi:10.1371/journal.pone.0134088.g004

other risk factors that promote the occurrence of MI or CVD, and therefore the possible mechanism by which gout affects the risk of MI remains unclear.

### Clinical implications

To some extent, the findings from our meta-analysis of previous studies are clinically significant. Despite significant heterogeneity, all of the consistent evidence revealed an increased risk of MI in patients with gout. However, gout was only found to associate with non-fatal MI, but not fatal MI; this might largely be because of mortality was not attributable to the fatal MI events, which were excluded from the analysis, or because a lower incidence of these events was observed [16]. However, a recently published study that explored the risk of mortality from fatal MI in patients with gout also reported no relationship between gout and fatal MI [54]. The reason for this lack of association is also unclear and it might be attributable to

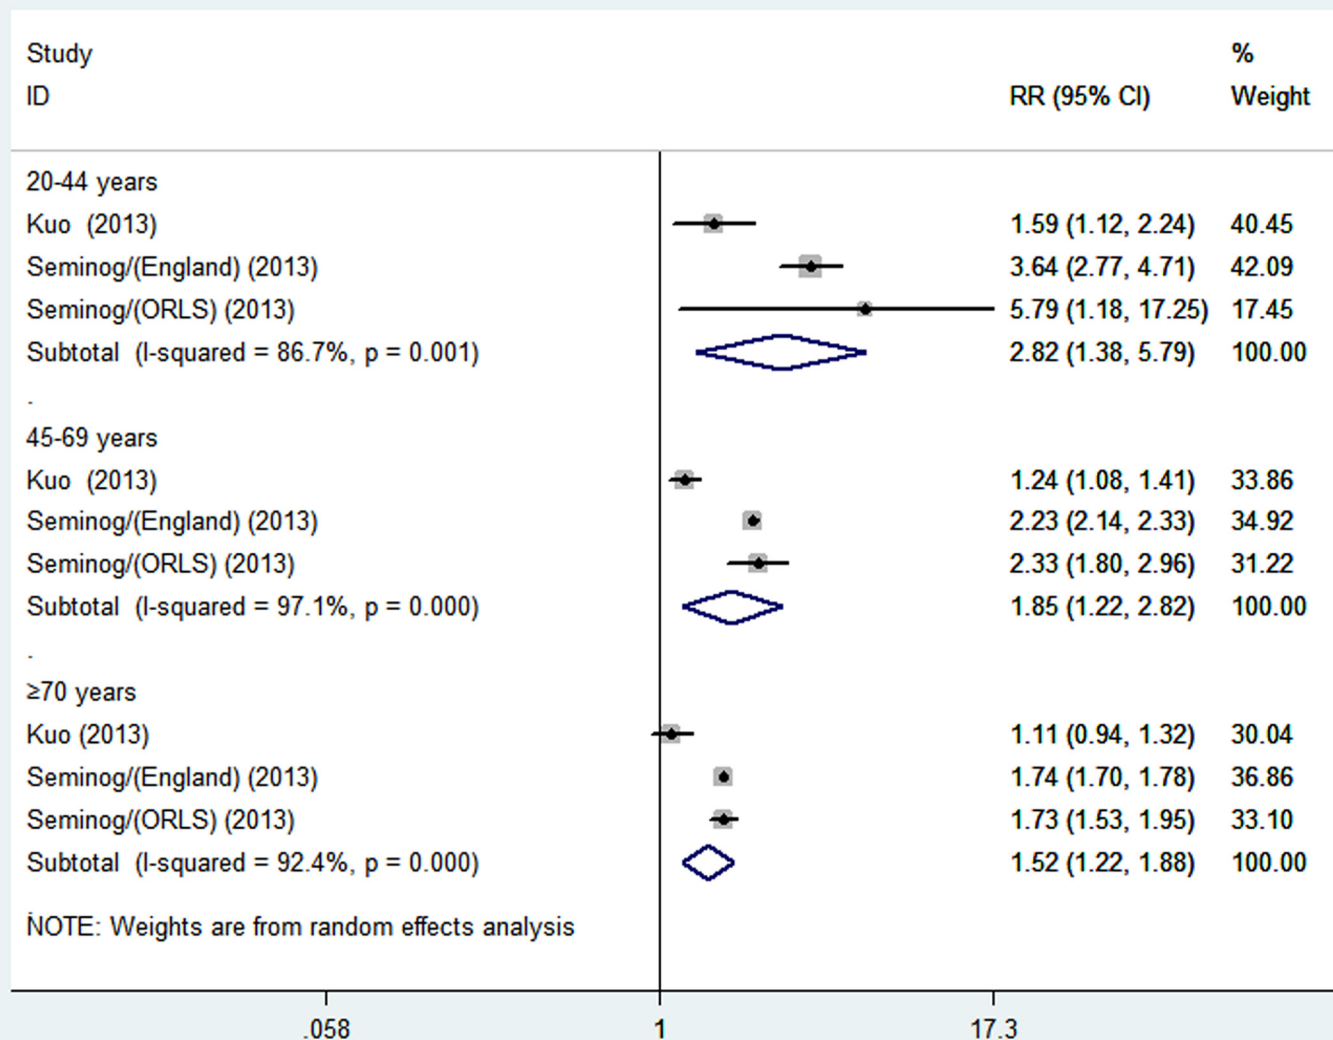

**Fig 5. Meta-analysis of the association between gout and risk of myocardial infarction in age groups.**

doi:10.1371/journal.pone.0134088.g005

classification bias and/or surveillance bias. Interestingly, neither study found an association between gout and risk of suffering from fatal MI or mortality from fatal MI, we believe this is well worth further exploration.

Gender-related differences in the association between gout and MI remain poorly understood. As gout predominantly affects men, and only a handful of studies have included women, and there remains controversy about the strength of gender-related associations [15–17, 55]. This controversy might result from differences in uric acid levels associated with physiological function, age, natural menopause and other baseline characteristics of the study cohorts [56]. However, the pooled results suggest that gout is associated with an increased risk of MI in both women and men. Interestingly, the result of our age groups analysis revealed an MI risk gradient that increased MI risk with a younger age at gout onset; in other words, the risk of MI was higher among young patients than older patients, and this finding was somewhat contradictory

to the common theory that young people lack traditional CVD or MI risk factors. Although the reason for this phenomenon is unclear, the results of our meta-analysis suggest that these young patients with gout might have other confounding metabolic or vascular risk factors, although these potential factors were seldom observed or unknown; therefore, preventive management and monitoring of MI should be emphasized for all patients diagnosed with gout regardless of age.

## Limitations

This study has several important potential limitations inherent to the meta-analytic design. The crucial limitation of our study is the observational nature of the investigations, which might introduces bias from various sources, as well as confounding from other risk factors that could provide an alternative explanation for the significant association observed between gout and the risk of MI. However, allowing for the impossibility of a randomized controlled trial, the included cohort studies had an average NOS of 8, which might reduces the likelihood of recall bias. Admittedly, the NOS has a low inter-reviewer reliability, therefore, the quality appraisal should be performed by at least two reviewers to reduce assessment bias [57].

Second, our meta-analysis contained significant heterogeneity across studies in terms of the study design, follow-up duration, definition of gout, assessment of MI, as well as inconsistent adjustment for vascular risk factors in the multivariate analyses, which might have led to confounding bias; furthermore, inaccurate classification bias might also led to heterogeneity. Furthermore, the confidence intervals for the analysis of fatal MI were very wide, suggesting a possible association between gout and fatal MI that was simply not observed in this dataset, and additional studies will be needed to clarify this phenomenon. Other potential sources of bias are mainly attributable to the nature of data; most studies used data was from various healthcare databases, which usually lack modifying factors.

A third limitation is that there only five articles were confirmed and available for inclusion in this study, rendering the results prone to influence from publication bias or random error, and lacking sufficient reliability to draw a conclusion in a definitive manner.

Finally, although we searched without language restriction and used a comprehensive search strategy, some studies published in other journals or with negative findings might not appear in international journal databases and thus might not have been included in our meta-analysis.

## Conclusions

In conclusion, the results of this meta-analysis of five studies indicated that both male and female patients with gout have an increased risk of MI; however, this association remains with non-fatal MI, but not with fatal MI. Additionally, MI risk was found to increase in a gradient with a younger age at gout onset. Nevertheless, these results should be interpreted with caution, given the potential bias and confounding in the included studies.

## Supporting Information

**S1 PRISMA Checklist.** PRISMA 2009 checklist used in this meta-analysis.  
(DOC)

**S1 Table.** The covariates for adjustment in each study.  
(DOC)

**S2 Table.** The Newcastle-Ottawa Scale (NOS) for assessing the methodological quality of included studies.  
(DOC)

## Author Contributions

Conceived and designed the experiments: SCL LX JZ XHL DKH HTZ HJL. Performed the experiments: SCL LX JZ XHL DKH. Analyzed the data: SCL LX JZ XHL. Contributed reagents/materials/analysis tools: SCL LX JZ XHL DKH. Wrote the paper: SCL LX DKH.

## References

1. WHO. (Updated May 2014) World Health Organization: the 10 leading causes of death by broad income group. Available: <http://www.Who.int/mediacentre/factsheets/fs310/en/> [Accessed July 2015]
2. WHO. (2008) The global burden of disease: 2004 update. Geneva, Switzerland: WHO.
3. Go AS, Mozaffarian D, Roger VL, Benjamin EJ, Berry JD, Borden WB, et al. (2013) Heart disease and stroke statistics—2013 update: a report from the American Heart Association. *Circulation* 127:e6–e245. doi: [10.1161/CIR.0b013e31828124ad](https://doi.org/10.1161/CIR.0b013e31828124ad) PMID: [23239837](https://pubmed.ncbi.nlm.nih.gov/23239837/)
4. Xu J, Kochanek KD, Murphy SL, Tejada-Vera B. (2010) Deaths: final data for 2007. *Natl Vital Stat Rep* 58:1–19.
5. Annemans L, Spaepen E, Gaskin M, Bonnemaire M, Malier V, Gilbert T, et al. (2008) Gout in the UK and Germany: prevalence, comorbidities and management in general practice 2000–2005. *Ann Rheum Dis* 67:960–966. PMID: [17981913](https://pubmed.ncbi.nlm.nih.gov/17981913/)
6. Bardin T., Bouée S., Clerson P., Chalès G., Doherty M., Flipo R.-M., et al. (2014) SAT0544 Prevalence of Gout in the Adult Population of France in 2013. *Ann Rheum Dis* 73:787–788
7. Zhu Y, Pandya BJ, Choi HK. (2011) Prevalence of gout and hyperuricemia in the US general population: the National Health and Nutrition Examination Survey 2007–2008. *Arthritis Rheum* 63:3136–3141. doi: [10.1002/art.30520](https://doi.org/10.1002/art.30520) PMID: [21800283](https://pubmed.ncbi.nlm.nih.gov/21800283/)
8. Arromdee E, Michet CJ, Crowson CS, O'Fallon WM, Gabriel SE. (2002) Epidemiology of gout: is the incidence rising? *J Rheumatol* 29:2403–2406. PMID: [12415600](https://pubmed.ncbi.nlm.nih.gov/12415600/)
9. Roddy E, Zhang W, Doherty M. (2007) The changing epidemiology of gout. *Nat Clin Pract Rheumatol* 3:443–449. PMID: [17664951](https://pubmed.ncbi.nlm.nih.gov/17664951/)
10. Weaver AL. (2008) Epidemiology of gout. *Cleve Clin J Med* 75:S9–12. PMID: [18819329](https://pubmed.ncbi.nlm.nih.gov/18819329/)
11. Libby P, Theroux P. (2005) Pathophysiology of coronary artery disease. *Circulation* 111:3481–3488. PMID: [15983262](https://pubmed.ncbi.nlm.nih.gov/15983262/)
12. Tiong AY, Brieger D. (2005) Inflammation and coronary artery disease. *Am Heart J* 150:11–18. PMID: [16084145](https://pubmed.ncbi.nlm.nih.gov/16084145/)
13. Krishnan E, Baker JF, Furst DE, Schumacher HR. (2006) Gout and the risk of acute myocardial infarction. *Arthritis Rheum* 54:2688–2696. PMID: [16871533](https://pubmed.ncbi.nlm.nih.gov/16871533/)
14. Choi HK, Curhan G. (2007) Independent impact of gout on mortality and risk for coronary heart disease. *Circulation* 116:894–900. PMID: [17698728](https://pubmed.ncbi.nlm.nih.gov/17698728/)
15. De Vera MA, Rahman MM, Bhole V, Kopec JA, Choi HK. (2010) Independent impact of gout on the risk of acute myocardial infarction among elderly women: a population-based study. *Ann Rheum Dis* 69:1162–1164. doi: [10.1136/ard.2009.122770](https://doi.org/10.1136/ard.2009.122770) PMID: [20124358](https://pubmed.ncbi.nlm.nih.gov/20124358/)
16. Kuo CF, Yu KH, See LC, Chou IJ, Ko YS, Chang HC, et al. (2013) Risk of myocardial infarction among patients with gout: a nationwide population-based study. *Rheumatology (Oxford)* 52:111–117.
17. Seminog OO, Goldacre MJ. (2013) Gout as a risk factor for myocardial infarction and stroke in England: evidence from record linkage studies. *Rheumatology (Oxford)* 52:2251–2259.
18. So A. (2010) Epidemiology: Gout—bad for the heart as well as the joint. *Nat Rev Rheumatol* 6:386–387. doi: [10.1038/nrrheum.2010.78](https://doi.org/10.1038/nrrheum.2010.78) PMID: [20596050](https://pubmed.ncbi.nlm.nih.gov/20596050/)
19. Zhu Y, Pandya BJ, Choi HK. (2012) Comorbidities of gout and hyperuricemia in the US general population: NHANES 2007–2008. *Am J Med* 125:679–687.e1. doi: [10.1016/j.amjmed.2011.09.033](https://doi.org/10.1016/j.amjmed.2011.09.033) PMID: [22626509](https://pubmed.ncbi.nlm.nih.gov/22626509/)
20. Stroup DF, Berlin JA, Morton SC, Olkin I, Williamson GD, Rennie D, et al. (2000) Meta-analysis of observational studies in epidemiology: a proposal for reporting. Meta-analysis Of Observational Studies in Epidemiology (MOOSE) group. *JAMA* 283:2008–2012. PMID: [10789670](https://pubmed.ncbi.nlm.nih.gov/10789670/)
21. GA Wells, B Shea, D O'Connell, J Peterson, V Welch, M Losos, et al. (2013) The Newcastle-Ottawa Scale (NOS) for assessing the quality of nonrandomised studies in meta-analyses. Available: [www.ohri.ca/programs/clinical\\_epidemiology/oxford.asp](http://www.ohri.ca/programs/clinical_epidemiology/oxford.asp). [Accessed July 2015]
22. Begg CB, Mazumdar M. (1994) Operating characteristics of a rank correlation test for publication bias. *Biometrics* 50:1088–1101. PMID: [7786990](https://pubmed.ncbi.nlm.nih.gov/7786990/)

23. DerSimonian R, Laird N. (1986) Meta-analysis in clinical trials. *Control Clin Trials* 7:177–88. PMID: [3802833](#)
24. Higgins JP, Thompson SG, Deeks JJ, Altman DG. (2003) Measuring inconsistency in meta-analyses. *BMJ* 327:557–560. PMID: [12958120](#)
25. Dalbeth N, Haskard DO. (2005) Mechanisms of inflammation in gout. *Rheumatology (Oxford)* 44:1090–1096.
26. Tjong AY, Brieger D. (2005) Inflammation and coronary artery disease. *Am Heart J* 150:11–18. PMID: [16084145](#)
27. Pascual E. (1991) Persistence of monosodium urate crystals and low-grade inflammation in the synovial fluid of patients with untreated gout. *Arthritis Rheum* 34:141–145. PMID: [1994910](#)
28. Dalbeth N, Haskard DO. (2005) Mechanisms of inflammation in gout. *Rheumatology (Oxford)* 44:1090–1096.
29. Krishnan E, Svendsen K, Neaton JD, Grandits G, Kuller LH. (2008) Long-term cardiovascular mortality among middle-aged men with gout. *Arch Intern Med* 168:1104–1110. doi: [10.1001/archinte.168.10.1104](#) PMID: [18504339](#)
30. Busso N, So A. (2010) Mechanisms of inflammation in gout. *Arthritis Res Ther* 12:206. doi: [10.1186/ar2952](#) PMID: [20441605](#)
31. Edwards NL. (2008) The role of hyperuricemia and gout in kidney and cardiovascular disease. *Cleve Clin J Med* 75:S13–16.
32. Ballocca F, D'Ascenzo F, Moretti C, Omedè P, Cerrato E, Barbero U, et al. (2014) Predictors of cardiovascular events in patients with systemic lupus erythematosus (SLE): a systematic review and meta-analysis. *Eur J Prev Cardiol* [Epub ahead of print]
33. Johnson RJ, Kang DH, Feig D, Kivlighn S, Kanellis J, Watanabe S, et al. (2003) Is there a pathogenetic role for uric acid in hypertension and cardiovascular and renal disease? *Hypertension* 41:1183–1190. PMID: [12707287](#)
34. Becker MA, Jolly M. (2006) Hyperuricemia and associated diseases. *Rheum Dis Clin North Am* 32:275–93, v-vi. PMID: [16716880](#)
35. Halligan C, Matteson EL. (2005) Hyperuricemia and coronary artery disease. *Current Rheumatology Reviews* 1:193–197.
36. Brodov Y, Behar S, Boyko V, Chouraqui P. (2010) Effect of the metabolic syndrome and hyperuricemia on outcome in patients with coronary artery disease (from the Bezafibrate Infarction Prevention Study). *Am J Cardiol* 106:1717–1720. doi: [10.1016/j.amjcard.2010.07.046](#) PMID: [21126615](#)
37. Kim SY, Guevara JP, Kim KM, Choi HK, Heitjan DF, Albert DA. (2010) Hyperuricemia and coronary heart disease: a systematic review and meta-analysis. *Arthritis Care Res (Hoboken)* 62:170–180.
38. Fang J, Alderman MH. (2000) Serum uric acid and cardiovascular mortality the NHANES I epidemiologic follow-up study, 1971–1992. National Health and Nutrition Examination Survey. *JAMA* 283:2404–2410. PMID: [10815083](#)
39. Niskanen LK, Laaksonen DE, Nyyssönen K, Alfthan G, Lakka HM, Lakka TA, et al. (2004) Uric acid level as a risk factor for cardiovascular and all-cause mortality in middle-aged men: a prospective cohort study. *Arch Intern Med* 164:1546–1551. PMID: [15277287](#)
40. Freedman DS, Williamson DF, Gunter EW, Byers T. (1995) Relation of serum uric acid to mortality and ischemic heart disease. The NHANES I Epidemiologic Follow-up Study. *Am J Epidemiol* 141:637–644. PMID: [7702038](#)
41. Verdecchia P, Schillaci G, Reboldi G, Santeusano F, Porcellati C, Brunetti P. (2000) Relation between serum uric acid and risk of cardiovascular disease in essential hypertension. The PIUMA study. *Hypertension* 36:1072–1078. PMID: [11116127](#)
42. Lee J, Sparrow D, Vokonas PS, Landsberg L, Weiss ST. (1995) Uric acid and coronary heart disease risk: evidence for a role of uric acid in the obesity-insulin resistance syndrome. The Normative Aging Study. *Am J Epidemiol* 142:288–294. PMID: [7631632](#)
43. Feig DI, Kang DH, Johnson RJ. (2008) Uric acid and cardiovascular risk. *N Engl J Med* 359:1811–1121. doi: [10.1056/NEJMr0800885](#) PMID: [18946066](#)
44. Mazzali M, Hughes J, Kim YG, Jefferson JA, Kang DH, Gordon KL, et al. (2001) Elevated uric acid increases blood pressure in the rat by a novel crystal-independent mechanism. *Hypertension* 38:1101–1106. PMID: [11711505](#)
45. Sánchez-Lozada LG, Tapia E, Avila-Casado C, Soto V, Franco M, Santamaría J, et al. (2002) Mild hyperuricemia induces glomerular hypertension in normal rats. *Am J Physiol Renal Physiol* 283: F1105–1110. PMID: [12372787](#)

46. Sánchez-Lozada LG, Tapia E, Santamaría J, Avila-Casado C, Soto V, Nepomuceno T, et al. (2005) Mild hyperuricemia induces vasoconstriction and maintains glomerular hypertension in normal and remnant kidney rats. *Kidney Int* 67:237–247. PMID: [15610247](#)
47. Libby P, Ridker PM, Maseri A. Inflammation and atherosclerosis. (2002) *Circulation* 105:1135–1143. PMID: [11877368](#)
48. Kanellis J, Watanabe S, Li JH, Kang DH, Li P, Nakagawa T, et al. (2003) Uric acid stimulates monocyte chemoattractant protein-1 production in vascular smooth muscle cells via mitogen-activated protein kinase and cyclooxygenase-2. *Hypertension* 41:1287–1293. PMID: [12743010](#)
49. Netea MG, Kullberg BJ, Blok WL, Netea RT, van der Meer JW. (1997) The role of hyperuricemia in the increased cytokine production after lipopolysaccharide challenge in neutropenic mice. *Blood* 89:577–582. PMID: [9002961](#)
50. Mazzali M, Hughes J, Kim YG, Jefferson JA, Kang DH, Gordon KL, et al. (2001) Elevated uric acid increases blood pressure in the rat by a novel crystal-independent mechanism. *Hypertension* 38:1101–1106. PMID: [11711505](#)
51. Kanellis J, Kang DH. (2005) Uric acid as a mediator of endothelial dysfunction, inflammation, and vascular disease. *Semin Nephrol* 25:39–42. PMID: [15660333](#)
52. Gersch C, Palii SP, Kim KM, Angerhofer A, Johnson RJ, Henderson GN. Inactivation of nitric oxide by uric acid. *Nucleosides Nucleotides Nucleic Acids* 27:967–978. doi: [10.1080/15257770802257952](#) PMID: [18696365](#)
53. Gür M, Sahin DY, Elbasan Z, Kalkan GY, Yıldız A, Kaya Z, et al. (2013) Uric acid and high sensitive C-reactive protein are associated with subclinical thoracic aortic atherosclerosis. *J Cardiol* 61:144–148. doi: [10.1016/j.jjcc.2012.08.023](#) PMID: [23159203](#)
54. Clarson LE, Chandratne P, Hider SL, Belcher J, Heneghan C, Roddy E, et al. (2015) Increased cardiovascular mortality associated with gout: a systematic review and meta-analysis. *Eur J Prev Cardiol* 22:335–343. doi: [10.1177/2047487313514895](#) PMID: [24281251](#)
55. Kuo CF, See LC, Luo SF, Ko YS, Lin YS, Hwang JS, et al. (2010) Gout: an independent risk factor for all-cause and cardiovascular mortality. *Rheumatology (Oxford)* 49:141–146.
56. Puig JG, Michán AD, Jiménez ML, Pérez de Ayala C, Mateos F. (1991) Female gout. Clinical spectrum and uric acid metabolism. *Arch Intern Med* 151:726–732. PMID: [2012455](#)
57. Hartling L, Milne A, Hamm MP, Vandermeer B, Ansari M, Tsertsvadze A, et al. (2013) Testing the Newcastle Ottawa Scale showed low reliability between individual reviewers. *J Clin Epidemiol* 66:982–993. doi: [10.1016/j.jclinepi.2013.03.003](#) PMID: [23683848](#)
